# Supplementary material
Source: PubMed Central journal article supplement (PMC4471148)
Supplement: NIHMS63539-supplement-01.pdf [file NIHMS63539-supplement-01.pdf]

**Network state-dependent inhibition of identified hippocampal CA3 axo-axonic cells *in vivo*.** Tim J Viney\*, Balint Lasztocki\*, Linda Katona\*, Michael G Crump\*, John J Tukker, Thomas Klausberger, Peter Somogyi

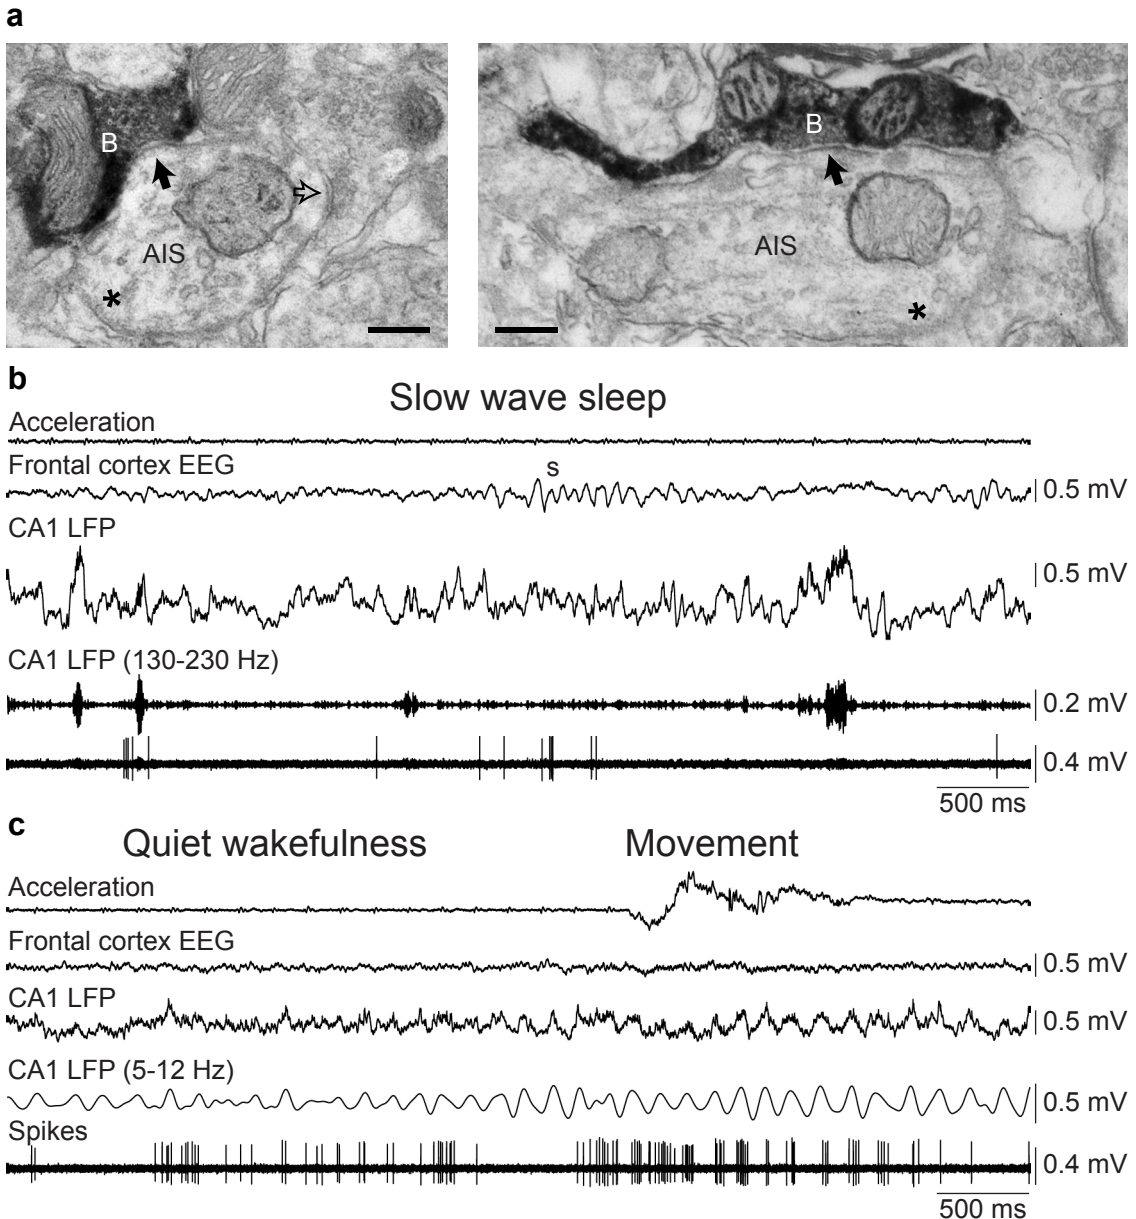

**Supplementary Figure 1.** A CA1 axo-axonic cell recorded in a freely moving rat is inhibited during sharp waves. **(a)** Left, a bouton (B) of cell TV34n filled with electron opaque HRP reaction end-product making a type II synapse (filled arrow) with a pyramidal cell AIS (identified by the dense membrane undercoating, asterisk); open arrow, a type II synapse with an unlabeled bouton. Right, another bouton of the same cell. Scale bars, 0.2  $\mu$ m. **(b)** and **(c)** Firing patterns of the identified AAC TV34n during **(b)** SWS and **(c)** during quiet wakefulness and head movement. Movement is detected by an accelerometer; spindles (s) are present in the EEG during SWS.

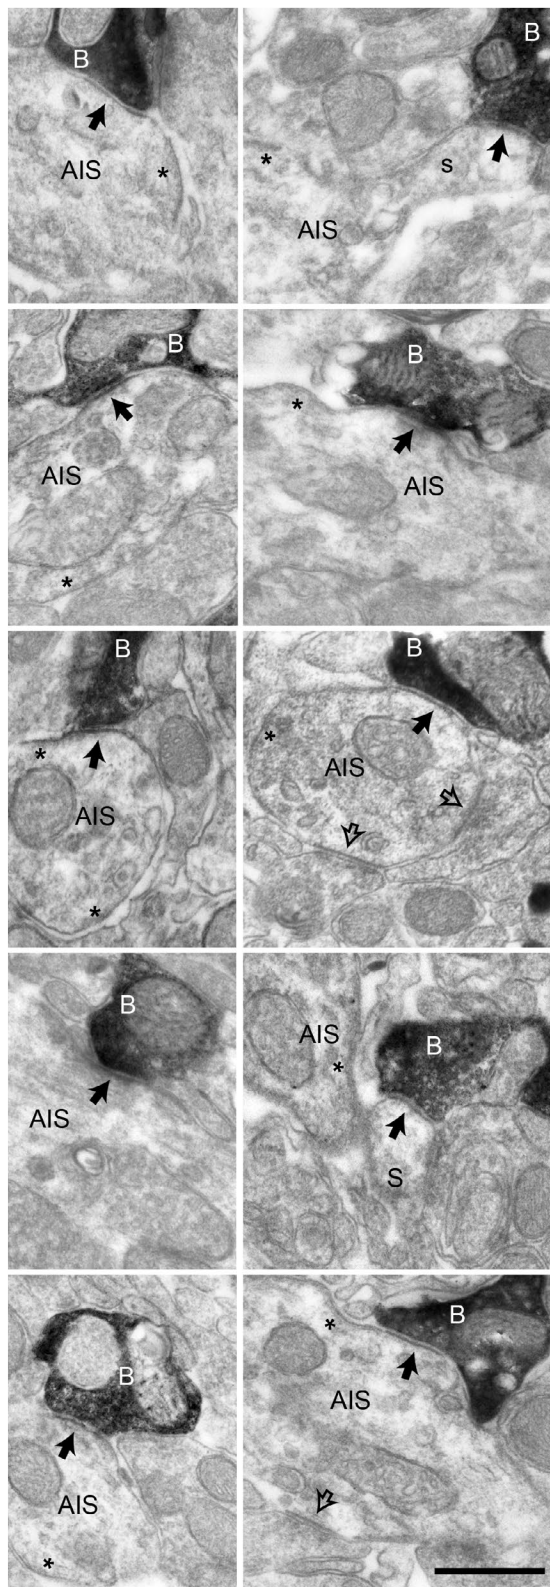

**Supplementary Figure 2.** Synaptic junctions between the boutons of identified CA3 axo-axonic cells and axon initial segments of pyramidal cells.

**Supplementary Figure 2 (continued).** Ten electron micrographs taken from serial sections of neurobiotin-labeled (HRP end-product) boutons (B) of AAC B45a making type II synapses (arrows) with AISs, identified by membrane undercoating (asterisks) and/or microtubule fascicles. Unlabeled boutons also make similar synapses (open arrows). Spines (s) from AISs, described previously (ref. 19), also receive one or more AAC synapses. Sections were not contrasted by lead. Scale for all images: 0.5  $\mu$ m.

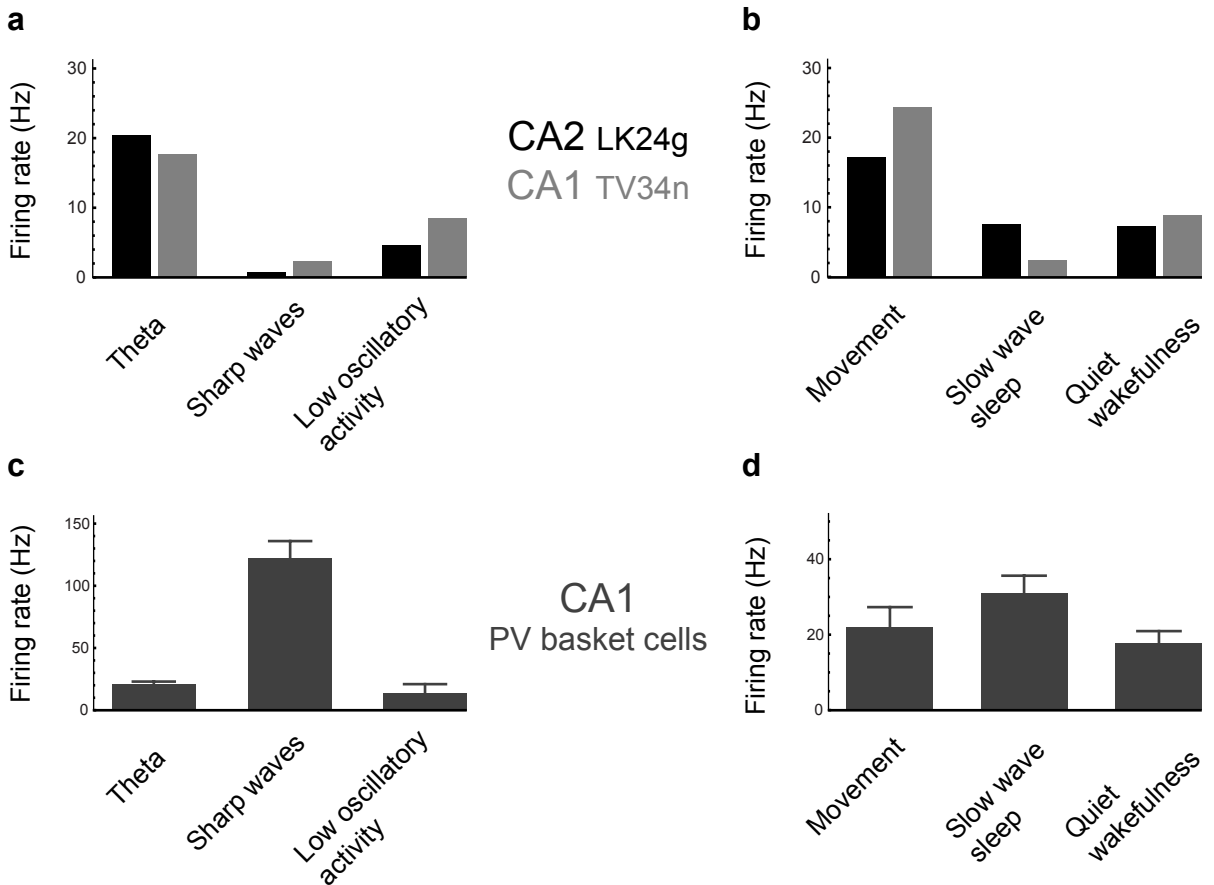

**Supplementary Figure 3.** State-dependent firing rates of identified axo-axonic cells in freely moving rats. **(a and b)** Firing rates of identified CA2 AAC LK24g (black) and CA1 AAC TV34n (gray) during **(a)** network oscillations and **(b)** behavioral states. **(c and d)** Mean  $\pm$  s.e.m. firing rates of 5 published identified parvalbumin-expressing basket cells (ref. 20) for comparison with the AACs. Note the different rates during sharp waves when compared to theta oscillations.



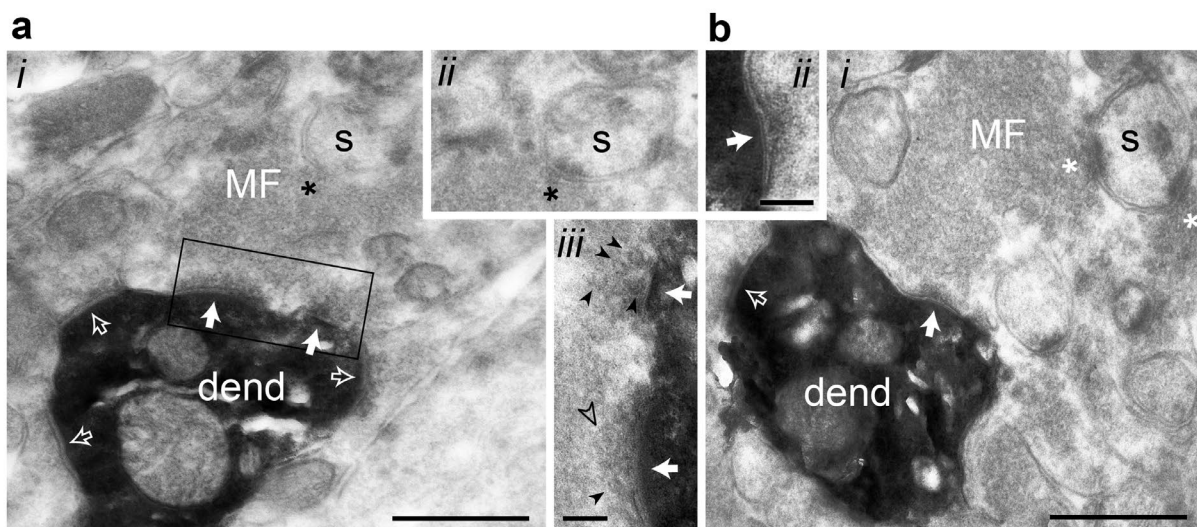

**Supplementary Figure 4.** Innervation of axo-axonic cell dendrites by mossy fiber terminals. **(a,i)** Electron micrograph of a neurobiotin-labeled AAC dendrite in sLuc (dend, cell B45a) receiving synaptic input (filled white arrows) from a large mossy fiber bouton (MF) recognized by dense vesicular filling. Unfilled white arrows, synapses made by boutons other than the large mossy terminal; s, invaginated spine from a thorny excrescence of a CA3 pyramidal cell dendrite. **(a,ii)** Serial section of the spine (s) with synaptic junction (asterisk). **(a,iii)** Enlargement of synaptic junctions in **i** (white arrows). Image captured at a different angle of tilt. Black arrowheads, synaptic vesicles; open arrowhead, dense core vesicle. **(b)** Same as in **a,i**; another large mossy terminal (MF) making a synapse (white arrow, see inset **b,ii**) onto the same dendrite. Asterisks, synapses by the mossy terminal on a pyramidal cell spine (s). Sections were not contrasted by lead. Scale bars: **a,i**, **a,ii**, **b,i**, 0.5  $\mu\text{m}$ ; **a,iii**, **b,ii**, 0.1  $\mu\text{m}$ .

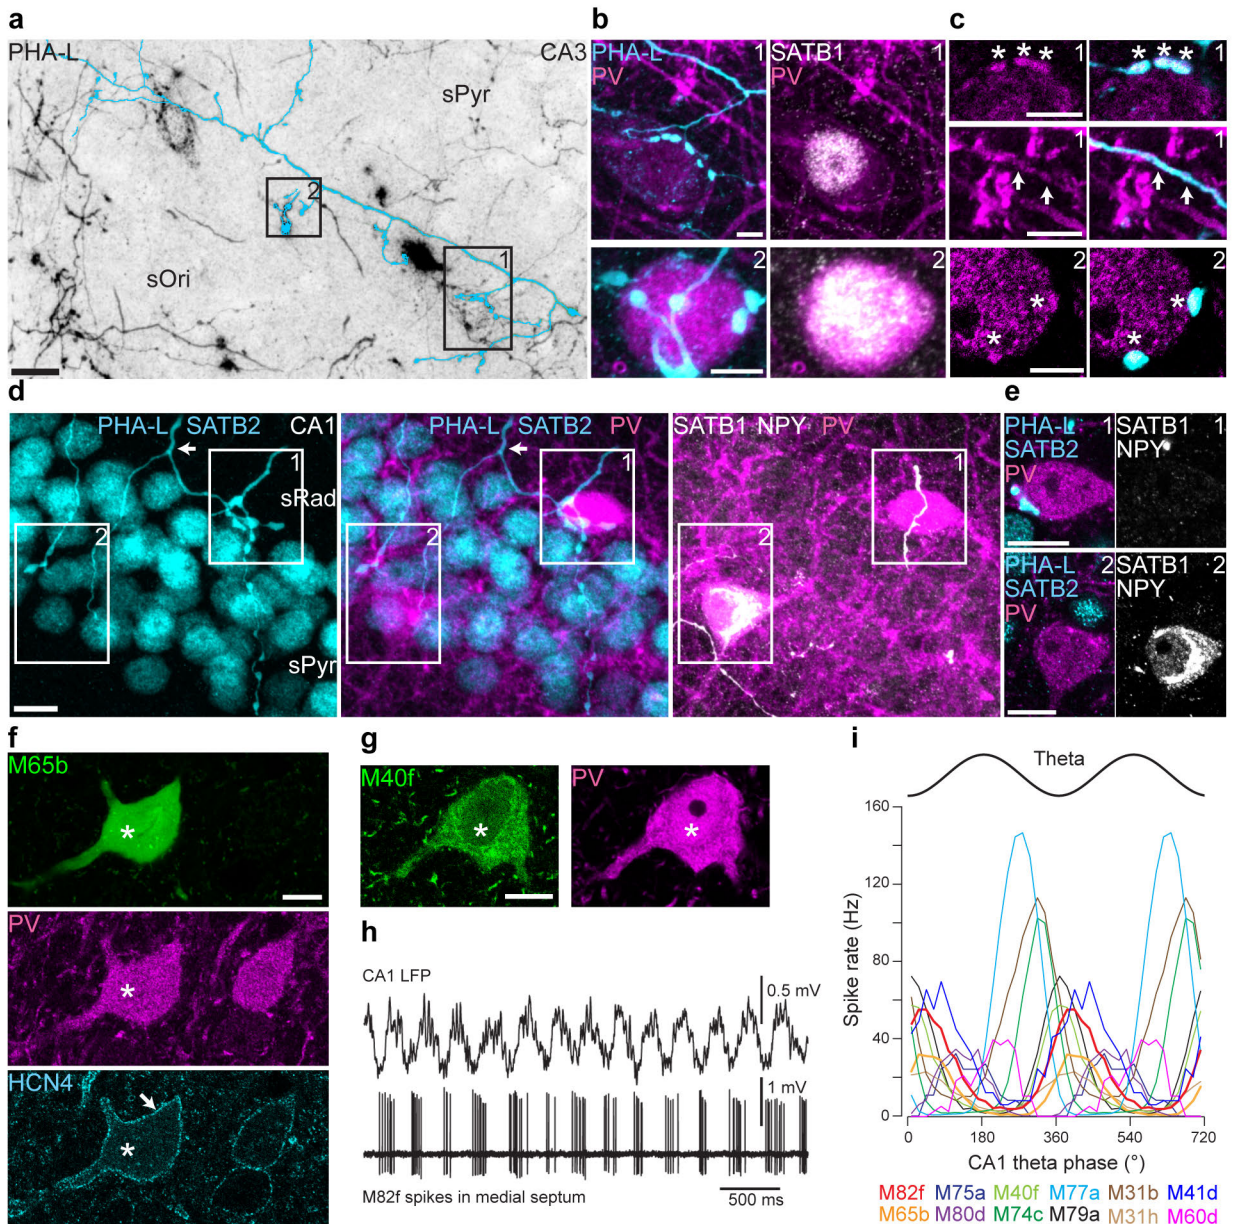

**Supplementary Figure 5.** Preferential targets of septo-hippocampal neurons and firing patterns of medial septal cells. **(a)** Digital trace (cyan) of a PHA-L-labeled septal axon preferentially targeting SATB1+/PV+ interneurons (unconnected PHA-L+ axons are black). **(b)** Left, septal-innervated PV+ somata from boxes 1 and 2 in **a**. Right, SATB1+ nuclei of same cells. **(c)** Single optical sections of parvalbumin-immunoreactivity from **b** shown with and without PHA-L-immunoreactivity. PV+ septal boutons, asterisks; main axon, arrows.

**Supplementary Figure 5 (continued).** (d) PHA-L-labeled septal axon (cyan, arrow) targeting a SATB1<sup>-</sup>/PV<sup>+</sup> soma (magenta, in box 2) amongst SATB2<sup>+</sup> CA1 pyramidal cells (cyan, nuclei). Another PV<sup>+</sup> cell (in box 1), is SATB1<sup>+</sup> and NPY<sup>+</sup> (both white, nucleus and Golgi apparatus, respectively) and not innervated by the septal axon. Note NPY<sup>+</sup> axons (white, e.g. inside boxed regions). (e) Single optical sections of both PV<sup>+</sup> cells (from boxes 1 and 2 in d). Immunoreactivity for parvalbumin and PHA-L/SATB2 (left), and SATB1 and NPY (right). The septal innervated cell (from box 1) is SATB1<sup>-</sup> and NPY<sup>-</sup>. (f and g) Single optical sections of *in vivo* recorded neurobiotin-labeled medial septal cells M65b (f) and M40f (g). Parvalbumin, magenta; HCN4, cyan; asterisks, somata; arrow, plasma membrane. (h) Firing patterns of cell M82f (see Figure 7) during theta oscillations recorded in CA1. (i) Firing rate versus CA1 theta phase for medial septal cells. Same color code as in Fig. 7e and those identified with axons projecting to CA3 are shown with thick lines. Confocal z-stacks (number of optical sections / thickness in  $\mu\text{m}$  / intensity projection mode): a, 73/29/average (montage); b box 1, 52/15/average; box 2, 83/24/average; d, 84/32/average. Scale bars ( $\mu\text{m}$ ): a, 20; b, c, e, 5; d, f, g, 10.



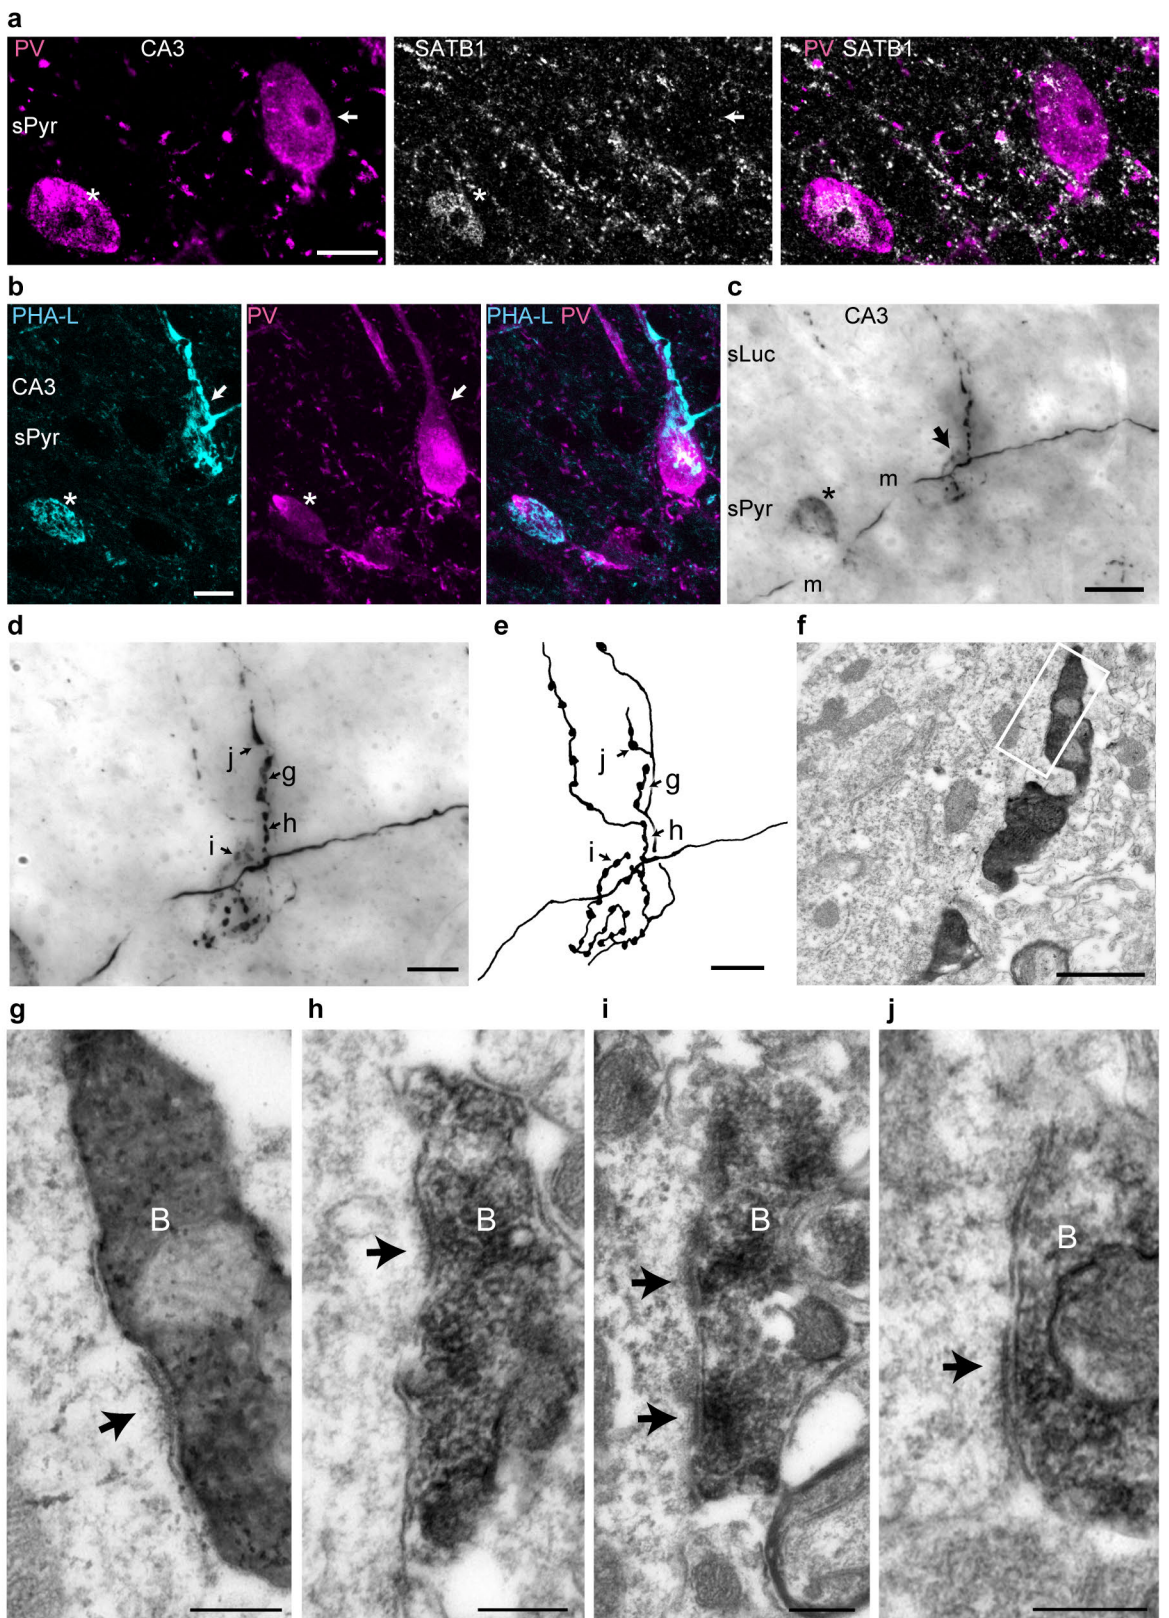

**Supplementary Figure 6.** Synapses between medial septal terminals and an axo-axonic cell identified by SATB1<sup>-</sup>/PV<sup>+</sup> labeling.

**Supplementary Figure 6 (continued).** (a) Median-filtered confocal z-projection of parvalbumin-immunoreactivity (magenta) in two CA3 neurons. One neuron (asterisk) shows nuclear SATB1 immunoreactivity (white), the other has no detectable SATB1 immunoreactivity (arrow). (b) Confocal z-projection of PHA-L-labeled boutons (cyan) apposed to the PV+ (magenta) SATB1-immunonegative neuron shown in a (arrow). The PV+/SATB1+ neuron in a is not innervated by PHA-L boutons (asterisk). Both cells contain endogenous biotin (cyan, somatic labeling) that is visualized by the streptavidin-conjugated Alexa Fluor secondary antibody bound to the biotinylated anti-PHA-L primary antibody. (c) Light microscopic image z-stack of the same area after converting PHAL-immunoreactivity to diaminobenzidine-based HRP reaction product (20X objective), showing PHA-L-innervated SATB1-/PV+ cell from a/b (arrow) revealing axon (partially myelinated, m) bypassing the SATB1+/PV+ cell (asterisk). Note endogenous biotin in the soma. (d) Light microscopic z-stack image of PHA-L-innervated cell (100X objective). (e) Two-dimensional reconstruction of the medial septal-innervated cell. Four boutons in d and e (marked g-j) correspond to the panels below. (f) Electron micrograph of PHA-L-labeled boutons apposed to the target cell. Boxed region is shown rotated in g. (g-j) Synaptic junctions (arrows) between PHA-L-labeled septal boutons (B) and the target AAC. Confocal z-stacks (number of optical sections / thickness in  $\mu\text{m}$  / intensity projection mode): a, 2 separate single optical z-sections in same x-y location superimposed / 1.1 / maximum; b, 9 (PHA-L) and 27 (parvalbumin) optical sections superimposed / 15.1 / maximum; c, 24 / 13.7 / minimum; d, 93 / 24.2 / minimum. Scale bars: a-b, d-e, 10  $\mu\text{m}$ ; c, 20  $\mu\text{m}$ ; f, 1  $\mu\text{m}$ ; g-j, 0.2  $\mu\text{m}$ .

| Identified medial septal neuron |                        | M82f                                                  | M65b                | M75a                | M80d                     | M40f                      |                     |
|---------------------------------|------------------------|-------------------------------------------------------|---------------------|---------------------|--------------------------|---------------------------|---------------------|
| <b>Immunohistochemical test</b> | Parvalbumin            | +s                                                    | +ds                 | +d                  | +ad                      | +s                        |                     |
|                                 | SATB1                  |                                                       | +n                  | +n                  | +n                       | +n                        |                     |
|                                 | HCN4                   | +ds                                                   | +ds                 | +s                  | +ds                      |                           |                     |
|                                 | Calretinin             |                                                       |                     |                     |                          | -s                        |                     |
|                                 | VGAT                   | +a                                                    |                     | +a                  | +a                       |                           |                     |
|                                 | NECAB 1                | -d                                                    | -d                  | -d                  | -d                       |                           |                     |
|                                 | Calbindin              |                                                       |                     |                     | -ds                      |                           |                     |
|                                 | Kv1.1                  |                                                       |                     | -s                  | +s                       |                           |                     |
| Target of projection axon       |                        | CA3                                                   | CA3                 | Dorsal fornix       | Dorsal fornix*           | na                        |                     |
| <b>In vivo firing patterns</b>  | CA1 SWRs               | Rate during SWRs (Hz)                                 | 23.4                | 17.2                | 7.3                      | 27.9                      | 43.9                |
|                                 |                        | Rate peri-SWR (Hz)                                    | 5.5                 | 8.0                 | 3.8                      | 5.5                       | 20.6                |
|                                 |                        | Mann-Whitney U comparison (P value, $\alpha = 0.05$ ) | $10^{-10}$          | $8 \times 10^{-7}$  | 0.002                    | $4 \times 10^{-37}$       | $2 \times 10^{-10}$ |
|                                 |                        | n (active)                                            | 27 (21)             | 34 (28)             | 33 (18)                  | 68 (58)                   | 57 (51)             |
|                                 | Theta firing rate (Hz) |                                                       | 23.1                | 11.7                | 12.8                     | 13.4                      | 20.0                |
|                                 | Theta coupling         | Mean phase CA1 ( $^{\circ}$ )                         | 49.8                | 56.2                | 144.1                    | 129.9                     | 20.8                |
|                                 |                        | Mean vector length CA1                                | 0.55                | 0.67                | 0.58                     | 0.68                      | 0.69                |
|                                 |                        | Rayleigh test P value (number of spikes)              | $<10^{-100}$ (5434) | $<10^{-100}$ (4024) | $4 \times 10^{-16}$ (95) | $4 \times 10^{-54}$ (233) | $<10^{-100}$ (4074) |
|                                 |                        | Mean action potentials per cycle                      | 6.0                 | 2.7                 | 3.5                      | 3.5                       | 5.2                 |
|                                 |                        | Active cycles (%)                                     | 99.1                | 96.5                | 93.1                     | 94.4                      | 98.7                |

**Supplementary Table 1a.**

| Medial septal neuron (unlabeled)      |                        | <b>M74c</b>                                           | <b>M77a</b>            | <b>M79a</b>             | <b>M31b</b>            | <b>M31h</b>            | <b>M41d</b>            | <b>M60d</b>                  |                              |
|---------------------------------------|------------------------|-------------------------------------------------------|------------------------|-------------------------|------------------------|------------------------|------------------------|------------------------------|------------------------------|
| <b><i>In vivo</i> firing patterns</b> | <b>CA1 SWRs</b>        | Rate during SWRs (Hz)                                 | 23.0                   | 36.5                    | 18.0                   | 35.3                   | 65.2                   | 30.6                         | 13.7                         |
|                                       |                        | Rate peri-SWR (Hz)                                    | 10.6                   | 15.7                    | 8.4                    | 4.3                    | 39.0                   | 14.1                         | 8.9                          |
|                                       |                        | Mann-Whitney U comparison (P value, $\alpha = 0.05$ ) | $10^{-5}$              | $4 \times 10^{-5}$      | $3 \times 10^{-8}$     | $9 \times 10^{-33}$    | $4 \times 10^{-5}$     | 0.003                        | 0.002                        |
|                                       |                        | n (active)                                            | 49 (34)                | 59 (42)                 | 60 (45)                | 45 (38)                | 31 (31)                | 22 (17)                      | 47 (33)                      |
|                                       | Theta firing rate (Hz) |                                                       | 28.9                   | 49.5                    | 24.1                   | 11.4                   | 46.9                   | 31.8                         | 14.2                         |
|                                       | <b>Theta coupling</b>  | Mean phase CA1 ( $^{\circ}$ )                         | 318.3                  | 269.9                   | 14.8                   | 32.9                   | 302.7                  | 71.0                         | 207.3                        |
|                                       |                        | Mean vector length CA1                                | 0.76                   | 0.73                    | 0.68                   | 0.46                   | 0.56                   | 0.46                         | 0.65                         |
|                                       |                        | Rayleigh test P value (number of spikes)              | $<10^{-100}$<br>(8942) | $<10^{-100}$<br>(32364) | $<10^{-100}$<br>(8339) | $<10^{-100}$<br>(4370) | $<10^{-100}$<br>(3761) | $2 \times 10^{-33}$<br>(330) | $8 \times 10^{-24}$<br>(113) |
|                                       |                        | Mean action potentials per cycle                      | 7.3                    | 10.0                    | 5.4                    | 3.4                    | 12.4                   | 7.9                          | 3.8                          |
|                                       |                        | Active cycles (%)                                     | 99.1                   | 99.8                    | 99.6                   | 90.6                   | 99.0                   | 95.5                         | 96.8                         |

**Supplementary Table 1b.**

**Supplementary Table 1 (a and b).** Properties of sharp-wave-activated medial septal neurons. (+,-) indicates positive and negative immunoreactivity, respectively. Measurement location: s, soma; n, nucleus; d, dendrites; a, axons; na, not available. \*Minor branches observed in medial CA1 and in subiculum.

| <b>Molecule</b>                                                                | <b>Host</b> | <b>Dilution and concentration (µg/ml)</b> | <b>Source</b> | <b>Code</b>                             |
|--------------------------------------------------------------------------------|-------------|-------------------------------------------|---------------|-----------------------------------------|
| Ankyrin-G                                                                      | mouse       | 1:500, 1000                               | 1             | 75-146, clone N106/36 (lot 441-4BK-91B) |
| Bassoon                                                                        | mouse       | 1:500, 950                                | 2             | VAM-PS003, clone SAP7F407 (lot 901438)  |
| Bassoon                                                                        | guinea pig  | 1:500, antiserum                          | 3             | 141004 (lot 3)                          |
| Calbindin                                                                      | rabbit      | 1:5000, antiserum                         | 4             | CB-38 (lot 5.5)                         |
| Calretinin                                                                     | rabbit      | 1:1000, antiserum                         | 4             | 7699/3H (lot 18299)                     |
| ErbB4                                                                          | mouse       | 1:1000, 200                               | 5             | MS-270-P, clone H4.77.16, same as Ab77  |
| GABAA $\alpha$ 1                                                               | rabbit      | 1:1000, 592                               | 6             | (Feb 2001 gift)                         |
| GABAA $\alpha$ 1                                                               | guinea pig  | 1:300, 244                                | 7*            | (June 2011 gift)                        |
| Gephyrin                                                                       | mouse       | 1:500, hybridoma supernatant              | 3             | 147 021 (lot 5), clone mAb7a/GlyR7a     |
| Gephyrin                                                                       | mouse       | 1:1000, 100                               | 3             | 147 011 (lot 25)                        |
| Hyperpolarization-activated cyclic nucleotide-gated potassium channel 4 (HCN4) | mouse       | 1:500, 1000                               | 1             | clone N114/10 (lot 441-4BK-95Aa)        |
| Kv1.1                                                                          | mouse       | 1:1000, 1000                              | 1             | clone K36/15 (lot 440-5HK-57)           |
| Metabotropic glutamate receptor 2/3 (mGluR2/3)                                 | guinea pig  | 1:200, antiserum                          | 7             | (Feb 1996 gift)                         |
| Metabotropic glutamate receptor type 7b (mGluR7b)                              | guinea pig  | 1:2000, 830                               | 7             | K74 (Sept 2000 gift)                    |
| Neuronal Ca <sup>2+</sup> -binding protein 1 (NECAB 1)                         | mouse       | 1:500, 500                                | 8             | H00064168-B01P (lot 09015 WUIZ)         |
| Neuronal nitrogen oxide synthase (nNOS)                                        | rabbit      | 1:1000, antiserum                         | 9             | AB5380 (lot 0507004069)                 |
| Neuropeptide Y (NPY)                                                           | sheep       | 1:700, antiserum                          | 9             | AB1583 (lot 25050288)                   |



|                                         |            |                   |    |                         |
|-----------------------------------------|------------|-------------------|----|-------------------------|
| Neuropeptide Y (NPY)                    | rabbit     | 1:5000, antiserum | 10 | 22940 (lot 208001)      |
| Parvalbumin                             | guinea pig | 1:5000, antiserum | 3  | 195 004 (lot 5)         |
| Parvalbumin                             | mouse      | 1:5000, ascites   | 4  | 235 (lot 10-11 F)       |
| Parvalbumin                             | rabbit     | 1:500, antiserum  | 4  | PV-28 (lot 5.5)         |
| Parvalbumin                             | goat       | 1:2000, antiserum | 4  | PVG-214 (lot 3.6)       |
| PHA-L                                   | goat       | 1:5000, 2000      | 11 | AS-2224 (lot T0817)     |
| PHA-L                                   | rabbit     | 1:500, 2000       | 11 | AS-2300 (lot Q0205)     |
| PHA-L-biotinylated                      | goat       | 1:1000, 1000      | 11 | BA-0224 (lot M0724)     |
| Pro-cholecystinin                       | rabbit     | 1:500, 250        | 12 | (April 2005 gift)       |
| SATB1 (N-14)                            | goat       | 1:400, 200        | 13 | sc-5989                 |
| SATB1 (N-14)                            | rabbit     | 1:1000, 1000      | 14 | ab70004                 |
| SATB2                                   | rabbit     | 1:1000, 100       | 14 | ab34735                 |
| SATB2 (SATBA4B10)                       | mouse      | 1:200, 100        | 14 | ab51502                 |
| Somatostatin (SOM)                      | mouse      | 1:200, 140        | 15 | gtx71935, clone SOM-018 |
| Vasoactive intestinal polypeptide (VIP) | rabbit     | 1:500, 1000       | 16 | 9535-0204 (lot 0109)    |
| Vesicular GABA transporter (VGAT)       | guinea pig | 1:500, antiserum  | 3  | 131 004                 |
| Vesicular GABA transporter (VGAT)       | rabbit     | 1:500, 600        | 12 | Af500 (July 2003 gift)  |
| Vesicular GABA transporter (VGAT)       | rabbit     | 1:500, 1000       | 3  | 131 003 (lot 21)        |

| Molecule (repeated) | Host  | Epitope                                                  | Specificity test                                                                                                                                                                                                                                                             | Notes |
|---------------------|-------|----------------------------------------------------------|------------------------------------------------------------------------------------------------------------------------------------------------------------------------------------------------------------------------------------------------------------------------------|-------|
| Ankyrin-G           | mouse | Monoclonal, fusion protein aa 990–2622, human Ankyrin-G. | No signal in knockout. Western blot; band at 270 kDa. Mouse cerebellar knockout: Zhou et al. ( <i>The Journal of Cell Biology</i> , 1998, <b>143</b> , 1295–1599). Characterization: Jenkins and Bennett ( <i>The Journal of Cell Biology</i> , 2001, <b>155</b> , 739–785). | a     |

|                  |            |                                                                                   |                                                                                                                                                                                                                                                                                                                                                                  |
|------------------|------------|-----------------------------------------------------------------------------------|------------------------------------------------------------------------------------------------------------------------------------------------------------------------------------------------------------------------------------------------------------------------------------------------------------------------------------------------------------------|
| Bassoon          | mouse      | Monoclonal, GST fusion protein aa 738–1035, rat bassoon.                          | Western blot; band at 420 kDa. Additional 350 kDa band and lower bands corresponding to putative proteolytic degradation products. Antibody generation and characterization: tom Dieck et al. ( <i>The Journal of Cell Biology</i> , 1998, <b>142</b> , 499–1008).                                                                                               |
| Bassoon          | guinea pig | Polyclonal, recombinant protein 330 C-terminal aa, rat bassoon.                   | Similar to mouse bassoon.                                                                                                                                                                                                                                                                                                                                        |
| Calbindin        | rabbit     | Polyclonal, recombinant rat calbindin D-28k.                                      | No signal in knockout. Mouse knockout: Airaksinen et al. ( <i>Proceedings of the National Academy of Sciences</i> , 1997, <b>94</b> , 1488–1581). Characterization in rat hippocampus: Sloviter ( <i>The Journal of Comparative Neurology</i> , 1989, <b>280</b> , 183–279).                                                                                     |
| Calretinin       | rabbit     | Polyclonal, recombinant human calretinin containing a 6-his tagged N-terminus.    | Western blot supplied by Swant. No signal in knockout animals; Swant; Schiffmann et al. ( <i>Proceedings of the National Academy of Sciences</i> , 1999, <b>96</b> , 5257–5262).                                                                                                                                                                                 |
| ErbB4            | mouse      | Monoclonal, extracellular fragment, recombinant human c-erbB-4/HER-4 oncoprotein. | No signal in knockout. Western blot; band as expected. Cross-species comparisons: Neddens et al. ( <i>Biological Psychiatry</i> , 2011, <b>70</b> , 636–681). Antibody generation: Vullhorst et al. ( <i>The Journal of Neuroscience</i> , 2009, <b>29</b> , 12255–12319), Chen et al. ( <i>Journal of Biological Chemistry</i> , 1996, <b>271</b> , 7620–7629). |
| GABAA $\alpha$ 1 | rabbit     | Polyclonal, N-terminal aa 1–9 (the extracellular side).                           | Same epitope, production, and labeling as rabbit GABAA $\alpha$ 1 characterized in Baude et al. ( <i>Cerebral Cortex</i> , 2007, <b>17</b> , 2094–2107), including mouse knockout test).                                                                                                                                                                         |
| GABAA $\alpha$ 1 | guinea pig | Fusion protein, amino acids 328–382, mouse $\alpha$ 1 subunit.                    | Western blot; band as expected. Tested in a knockout and in cells transfected with GABAA $\alpha$ 1 cDNA. Characterization: Kaufmann et al. ( <i>The Journal of</i>                                                                                                                                                                                              |

*Comparative Neurology*, 2009, **515**, 215–245).

|                                                                                |            |                                                                            |                                                                                                                                                                                                                                                                                                                                                                                                                                                            |
|--------------------------------------------------------------------------------|------------|----------------------------------------------------------------------------|------------------------------------------------------------------------------------------------------------------------------------------------------------------------------------------------------------------------------------------------------------------------------------------------------------------------------------------------------------------------------------------------------------------------------------------------------------|
| Gephyrin                                                                       | mouse      | Monoclonal, N-terminus, rat gephyrin.                                      | Western blot; band at 93 kDa. No Geph7a signal in knockout. Co-purifies with glycine receptor. Mouse knockout: Feng et al. 1998. Antibody generation: Pfeiffer et al. ( <i>Proceedings of the National Academy of Sciences</i> , 1984, <b>81</b> , 7224–7231)..                                                                                                                                                                                            |
| Gephyrin                                                                       | mouse      | Monoclonal, N-terminus, rat gephyrin.                                      | Same as Synaptic Systems 147 021 but purified IgG.                                                                                                                                                                                                                                                                                                                                                                                                         |
| Hyperpolarization-activated cyclic nucleotide-gated potassium channel 4 (HCN4) | mouse      | Monoclonal, fusion protein aa 1019–1108, rat HCN4, cytoplasmic domain.     | Western blot, Khurana et al. ( <i>The Journal of Neuroscience</i> , 2012, <b>32</b> , 2814–2823); Western blot and coimmunoprecipitation, demonstration of preabsorption by HCN4 peptide, Partida et al. ( <i>Investigative Ophthalmology &amp; Visual Science</i> , 2012, <b>53</b> , 1696–1703); same 137kD band western blot as a polyclonal antibody, Stradleigh et al. ( <i>The Journal of Comparative Neurology</i> , 2011, <b>519</b> , 2546–2573). |
| Kv1.1                                                                          | mouse      | Monoclonal, synthetic peptide aa 191–208, rat Kv1.1, extracellular domain. | No signal in knockout, Lorincz and Nusser ( <i>The Journal of Neuroscience</i> , 2008, <b>28</b> , 14329–14340). Recognizes some somata as well as AISs, Lorincz and Nusser 2008, Campanac et al. ( <i>Neuron</i> , 2013, <b>77</b> , 712–722). Also characterized by NeuroMab.                                                                                                                                                                            |
| Metabotropic glutamate receptor 2/3 (mGluR2/3)                                 | guinea pig | Polyclonal, intracellular C-terminal aa 813–872, rat mGluR2.               | Recognizes mGluR2 and mGluR3 (transfected cell lines, Western blots, preabsorption). Generation and characterization of rabbit antibody H12: Ohishi et al. ( <i>Neuron</i> , 1994, <b>13</b> , 55–121) and Shigemoto et al. ( <i>The Journal of Neuroscience</i> , 1997, <b>17</b> , 7503–7525).                                                                                                                                                           |
| Metabotropic glutamate receptor type 7b (mGluR7b)                              | guinea pig | Polyclonal, synthetic peptide, C-terminal, human mGluR7b.                  | Western blot; 2 bands as expected. Abolished by preadsorption. No cross-reactivity with mGluR7a. Generation and characterization: Shigemoto et al. ( <i>The Journal of Neuroscience</i> , 1997, <b>17</b> , 7503–7525).                                                                                                                                                                                                                                    |
| Neuronal Ca <sup>2+</sup> -binding protein 1 (NECAB 1)                         | mouse      | Polyclonal, full-length human NECAB 1.                                     | Same as in mouse. Western blots; as expected, no cross-reactivity with NECABs 2 and 3. Mouse brain, and antibody generation: Sugita et al. ( <i>Neuroscience</i> ,                                                                                                                                                                                                                                                                                         |

2002, **112**, 51–114).

|                                         |            |                                                                                  |                                                                                                                                                                                                                                                                                                                                                                                                                                                          |   |
|-----------------------------------------|------------|----------------------------------------------------------------------------------|----------------------------------------------------------------------------------------------------------------------------------------------------------------------------------------------------------------------------------------------------------------------------------------------------------------------------------------------------------------------------------------------------------------------------------------------------------|---|
| Neuronal nitrogen oxide synthase (nNOS) | rabbit     | Polyclonal, recombinant human nNOS.                                              | Does not cross react with iNOS or eNOS. No signal in knockout for rabbit antibody (Zymed/Invitrogen) of same mass. Mouse knockout and similar rabbit antibody: Gyurko et al. ( <i>Endocrinology</i> , 2002, <b>143</b> , 2767–2841).                                                                                                                                                                                                                     |   |
| Neuropeptide Y (NPY)                    | sheep      | Polyclonal, synthetic peptide conjugated to bovine thyroglobulin.                | Radioimmunoassays with other peptides lacked significant cross-reactivity except peptide YY. Antibody generation: Blessing et al. ( <i>The Journal of Comparative Neurology</i> , 1986, <b>248</b> , 285–585).                                                                                                                                                                                                                                           | b |
| Neuropeptide Y (NPY)                    | rabbit     | Polyclonal, synthetic porcine NPY conjugated to methylated bovine serum albumin. | No significant cross-reactivity with other related peptides (APP, PYY). Antibody generation and characterization: Allen et al. ( <i>Science</i> , 1983, <b>221</b> , 877–886).                                                                                                                                                                                                                                                                           | c |
| Parvalbumin                             | guinea pig | Polyclonal, full length rat parvalbumin.                                         | Western blot; abolished by pre-absorption with recombinant parvalbumin. Same labeling as Synaptic Systems rabbit antibody 195 002 and Swant monoclonal antibody 235. Rat hippocampus: Kosaka et al. ( <i>Brain Research</i> , 1987, <b>419</b> , 119–149), Sloviter ( <i>The Journal of Comparative Neurology</i> , 1989, <b>280</b> , 183–279). Mouse knockout: Schwaller et al. ( <i>The American Journal of Physiology</i> , 1999, <b>276</b> , 403). |   |
| Parvalbumin                             | mouse      | Monoclonal, carp muscle parvalbumin.                                             | No signal in knockout. Similar to other parvalbumin antibodies. Characterization: Celio et al. ( <i>Cell Calcium</i> , 1988, <b>9</b> , 81–87). Mouse knockout: Schwaller et al. ( <i>The American Journal of Physiology</i> , 1999, <b>276</b> , 403).                                                                                                                                                                                                  |   |
| Parvalbumin                             | rabbit     | Polyclonal, purified parvalbumin, rat testis.                                    | No signal in knockout, shown by Swant. Similar to other parvalbumin antibodies. Mouse knockout: Schwaller et al. ( <i>The American Journal of Physiology</i> , 1999, <b>276</b> , 403).                                                                                                                                                                                                                                                                  |   |
| Parvalbumin                             | goat       | Polyclonal, rat muscle                                                           | No signal in knockout, shown by Swant. Similar to                                                                                                                                                                                                                                                                                                                                                                                                        |   |

|                     |        |                                                                                                       |                                                                                                                                                                                                                                                                                                                                                                                                                                               |   |
|---------------------|--------|-------------------------------------------------------------------------------------------------------|-----------------------------------------------------------------------------------------------------------------------------------------------------------------------------------------------------------------------------------------------------------------------------------------------------------------------------------------------------------------------------------------------------------------------------------------------|---|
|                     |        | parvalbumin.                                                                                          | other parvalbumin antibodies. Mouse knockout: Schwaller et al. ( <i>The American Journal of Physiology</i> , 1999, <b>276</b> , 403).                                                                                                                                                                                                                                                                                                         |   |
| PHA-L               | goat   | Raised to pure lectins in hyperimmunized goats.                                                       | Reacts with both Phaseolus vulgaris erythroagglutinin (PHA-E) and leucoagglutinin (PHA-L).                                                                                                                                                                                                                                                                                                                                                    |   |
| PHA-L               | rabbit | Raised to pure lectins in hyperimmunized goats.                                                       | Reacts with both Phaseolus vulgaris erythroagglutinin (PHA-E) and leucoagglutinin (PHA-L).                                                                                                                                                                                                                                                                                                                                                    |   |
| PHA-L-biotinylated  | goat   | Raised to pure lectins in hyperimmunized goats.                                                       | Reacts with both Phaseolus vulgaris erythroagglutinin (PHA-E) and leucoagglutinin (PHA-L).                                                                                                                                                                                                                                                                                                                                                    |   |
| Pro-cholecystokinin | rabbit | Cysteine-tagged C-terminal aa (CSAEDYEYPS), pro-cholecystokinin coupled to keyhole limpet hemocyanin. | Similar labeling to two non-commercial antibodies characterized by Sloviter and Nilaver ( <i>The Journal of Comparative Neurology</i> , 1987, <b>256</b> , 42–102), Morino et al. ( <i>The European Journal of Neuroscience</i> , 1994, <b>6</b> , 681–773).                                                                                                                                                                                  |   |
| SATB1 (N-14)        | goat   | Polyclonal, N-terminus, human SATB1.                                                                  | Similar labeling to rabbit antibody ab70004. Mouse cortex: Huang et al. ( <i>Neuroscience Research</i> , 2011, <b>71</b> , 12–33). Mouse knockout: Balamotis et al. ( <i>Molecular and Cellular Biology</i> , 2012, <b>32</b> , 333–380).                                                                                                                                                                                                     | d |
| SATB1 (N-14)        | rabbit | Polyclonal, 18 aa near N-terminus, human SATB1.                                                       | No signal in knockout for a similar rabbit antibody. Western blot, different band to SATB2 at mouse P1. Neuron-specificity shown by NeuN colocalization. Original rabbit antibody: Dickinson et al. ( <i>Cell</i> , 1992, <b>70</b> , 631–1276). Mouse cortex: Huang et al. ( <i>Neuroscience Research</i> , 2011, <b>71</b> , 12–33). Mouse knockout: Balamotis et al. ( <i>Molecular and Cellular Biology</i> , 2012, <b>32</b> , 333–380). | e |
| SATB2               | rabbit | Polyclonal, synthetic peptide conjugated to keyhole limpet                                            | Same labeling as a non-commercial specific rabbit antibody that shows no cross-reactivity to SATB1 in mice; Western blot, double immunofluorescence tests.                                                                                                                                                                                                                                                                                    | f |

|                                         |            |                                                                                                       |                                                                                                                                                                                                                                                                                                                                                                                                              |
|-----------------------------------------|------------|-------------------------------------------------------------------------------------------------------|--------------------------------------------------------------------------------------------------------------------------------------------------------------------------------------------------------------------------------------------------------------------------------------------------------------------------------------------------------------------------------------------------------------|
|                                         |            | hemocyanin, aa 700 to C-terminus, mouse SATB2.                                                        | Isolation from rat cortex: Szemes et al. ( <i>Neurochemical Research</i> , 2006, <b>31</b> , 237–283). Non-commercial SATB2: Balamotis et al. ( <i>Molecular and Cellular Biology</i> , 2012, <b>32</b> , 333–380). Mouse brain: Britanova et al. <i>The European Journal of Neuroscience</i> , 2005, <b>21</b> , 658–726).                                                                                  |
| SATB2 (SATBA4B10)                       | mouse      | Monoclonal, recombinant fragment C-terminal, human SATB2.                                             | Same CA1 pyramid nuclear immunoreactivity as rabbit antibody ab34735 but with additional labeling as observed for SATB1. Adult mouse brain: Nielsen et al. ( <i>Cerebral Cortex</i> , 2010, <b>20</b> , 1904–1918; Fig. 1e). Mouse knockouts: Britanova et al. ( <i>American Journal of Human Genetics</i> , 2006, <b>79</b> , 668–746), Dobрева et al. ( <i>Cell</i> , 2006, <b>125</b> , 971–1057). g      |
| Somatostatin (SOM)                      | mouse      | Monoclonal, conjugated to a protein carrier, human somatostatin.                                      | Same labeling as a rat antibody Chemicon MAB354. No signal in preabsorption test for rat antibody. Mouse hippocampus, rat antibody: Jinno and Kosaka ( <i>The Journal of Comparative Neurology</i> , 2000, <b>428</b> , 377–465). Rat antibody test: Kubota et al. ( <i>Cerebral Cortex</i> , 2011, <b>21</b> , 1803–1820). h                                                                                |
| Vasoactive intestinal polypeptide (VIP) | rabbit     | Polyclonal, synthetic peptide, full-length mature human VIP conjugated to keyhole limpet haemocyanin. | Similar labeling to 3 other VIP antibodies raised in rabbit against porcine VIP: Sloviter and Nilaver ( <i>The Journal of Comparative Neurology</i> , 1987, <b>256</b> , 42–102).                                                                                                                                                                                                                            |
| Vesicular GABA transporter (VGAT)       | guinea pig | Polyclonal, Strep-Tag fusion protein, aa 2–115, rat VGAT (cytoplasmic domain).                        | Similar to C- and N-terminal fusion protein antibodies. Former gave additional unknown lower mass band in brain extract but same immunoreactivity as specific latter antibody; see rat cortex: Chaudhry et al. ( <i>The Journal of Neuroscience</i> , 1988, <b>18</b> , 9733–9783). Similar rabbit antibody generation: Takamori et al. ( <i>The Journal of Neuroscience</i> , 2000, <b>20</b> , 4904–4915). |
| Vesicular GABA transporter              | rabbit     | Polyclonal, aa 31–112, mouse VGAT                                                                     | Western blot; band at 57 kDa. Similar to guinea pig antibody. Characterization: Fukudome et al. ( <i>The</i>                                                                                                                                                                                                                                                                                                 |

|                                   |        |                                                                                                                |                                                                                                                                                     |
|-----------------------------------|--------|----------------------------------------------------------------------------------------------------------------|-----------------------------------------------------------------------------------------------------------------------------------------------------|
| (VGAT)                            |        | (cytoplasmic domain).                                                                                          | <i>European Journal of Neuroscience</i> , 2004, <b>19</b> , 2682–2774).                                                                             |
| Vesicular GABA transporter (VGAT) | rabbit | Polyclonal, synthetic peptide aa 75–87, rat VGAT (cytoplasmic domain) conjugated to keyhole limpet hemocyanin. | Same epitope and production as the specific VGAT/1 antibody by Takamori et al. ( <i>The Journal of Neuroscience</i> , 2000, <b>20</b> , 4904–4915). |

**Supplementary Table 2.** Primary antibodies. Notes: **a**, Observed in axon initial segments in CA3. Additional non-specific labeling occasionally observed in somata of CA3 sPyr. **b**, Weaker immunoreactivity in some interneurons in hippocampal sPyr compared to other NPY antibodies. Weak background in nuclei of neurons in sPyr. **c**, No significant background; strong immunoreactivity observed in subpopulations of hippocampal interneurons including in sPyr. **d**, At 1:100 dilution slight cross-reactivity detected with SATB2 (CA1 pyramidal cell nuclei). Weak immunoreactivity observed in CA4 neuron nuclei. **e**, Observed in hippocampal interneurons and not pyramidal neurons. Some interneurons that show strong immunoreactivity for the goat antibody sc-5989 are weak for the rabbit antibody. **f**, Observed in nuclei of CA1 pyramids and not interneurons. Cross-reactivity with blood vessels. **g**, Immunoreactivity observed in CA1 pyramidal cells and a subpopulation of interneurons, consistent with the combination of specific SATB2 and SATB1 antibodies. **h**, Labels same population of cells as other SOM antibodies but greater signal in dendrites and axon. List of sources: 1, UC Davis/NIH NeuroMab Facility, Davis, CA, USA. [www.neuromab.org](http://www.neuromab.org). 2, StressGen, via Bioquote Limited, York, UK. [www.bioquote.com](http://www.bioquote.com). Currently stocked by Enzo Life Sciences AG, Lausen, Switzerland. [www.enzolifesciences.com](http://www.enzolifesciences.com). 3, Synaptic Systems Gesellschaft für neurobiologische Forschung, Entwicklung und Produktion mbH, Goettingen, Germany. [www.ssys.com](http://www.ssys.com). 4, Swant, Bellinzona, Switzerland. [www.swant.com](http://www.swant.com). 5, Thermo Fisher Scientific, Kalamazoo, MI, USA. [www.labvision.com](http://www.labvision.com). 6, Kind gift from Prof. W. Sieghart, Brain Research Institute, Vienna, Austria. 7, Kind gift from Prof. R. Shigemoto, Division of Cerebral Structure, National Institute for Physiological Sciences, Okazaki, Japan. 8, Abnova, Taipei City, Taiwan. [www.abnova.com](http://www.abnova.com). 9, EMD Millipore Corporation, Billerica, MA, USA. [www.millipore.com](http://www.millipore.com). 10, ImmunoStar, Inc. (DiaSorin), Hudson, WI, USA. [www.immunostar.com](http://www.immunostar.com). 11, Vector Laboratories, Inc., Burlingame, CA, USA. [www.vectorlabs.com](http://www.vectorlabs.com). 12, Kind gift from Professor M. Watanabe / FRONTIER INSTITUTE Co.Ltd, Hokkaido, Japan. <http://www.frontier-institute.com>. 13, Santa Cruz Biotechnology, Inc., Santa Cruz, CA, USA. [www.scbt.com](http://www.scbt.com). 14, Abcam, Cambridge, UK. [www.abcam.com](http://www.abcam.com). 15, GeneTex, Inc. Irvine, CA, USA. [www.genetex.com](http://www.genetex.com). 16, MorphoSys UK Ltd t/a AbD Serotec, Oxford, UK. [www.abdserotec.com](http://www.abdserotec.com). \*Purified by Prof. W. Sieghart, Brain Research Institute, Vienna, Austria.
